# Supplementary material for: Analytical Performance of Next-Generation Sequencing and RT-PCR on Formalin-Fixed Paraffin-Embedded Tumor Tissues for PIK3CA Testing in HR+/HER2− Breast Cancer
Source: MDPI journal article supplement (doi:10.3390/cells11223545), 2022-11-09
Supplement: s1 [file s1]

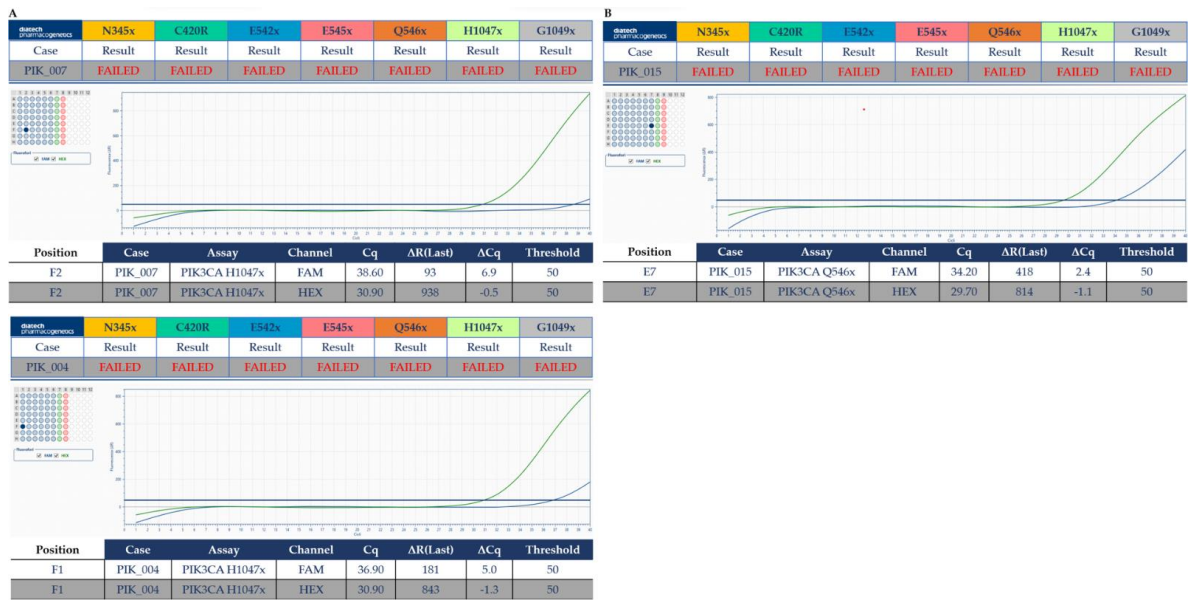

**Figure S1.** Visual representation of the RT-PCR raw data of cases reported as failed by the EasyPGX® analysis software.
